# Supplementary material for: Improved k-NN Mapping of Forest Attributes in Northern Canada Using Spaceborne L-Band SAR, Multispectral and LiDAR Data
Source: MDPI journal article supplement (doi:10.3390/rs14051181), 2022-02-27
Supplement: s1 [file s1]

## Supplementary Material

### Tables S1 to S4

**Table S1:** Pearson correlation coefficient  $r$  ( $p$ -value  $< 0.001$ ) between pairs of five forest attributes within the reference set of GLAS surrogate forest inventory (FI) plots ( $n = 3600$ ). Numbers in bold characters are for  $r$  values  $> 0.95$ .

|               | Stand<br>height | Crown<br>closure | Stand<br>volume | Total<br>volume | AGB  |
|---------------|-----------------|------------------|-----------------|-----------------|------|
| Stand height  | 1.00            |                  |                 |                 |      |
| Crown closure | 0.75            | 1.00             |                 |                 |      |
| Stand volume  | <b>0.97</b>     | 0.63             | 1.00            |                 |      |
| Total volume  | <b>0.98</b>     | 0.66             | 1.00            | 1.00            |      |
| AGB           | <b>0.98</b>     | 0.69             | <b>0.98</b>     | <b>0.98</b>     | 1.00 |

**Table S2:** Descriptive statistics for “observed” values of five forest attributes using both all reference/validation samples (ALL) and partitioned by three forest cover types (Conifer, Broadleaf, Mixedwood) for: a) a reference dataset from GLAS surrogate forest inventory (FI) plots and b) two validation sets: National Forest Inventory (NFI ) plots and boreal transect airborne laser scanning (BT-ALS) LiDAR plots. Empty cells are due to missing validation sets for crown closure.

| Attribute                                        | Forest type | a) Reference set |      |       |       |                 | b) Validation sets |      |       |       |       |           |     |       |       |       |
|--------------------------------------------------|-------------|------------------|------|-------|-------|-----------------|--------------------|------|-------|-------|-------|-----------|-----|-------|-------|-------|
|                                                  |             | GLAS             |      |       |       |                 | NFI <sup>a</sup>   |      |       |       |       | BT-ALS    |     |       |       |       |
|                                                  |             | n                | Min  | Max   | Mean  | SD <sup>b</sup> | n                  | Min  | Max   | Mean  | SD    | n         | Min | Max   | Mean  | SD    |
| Stand height (m)                                 | ALL         | 3,600            | 3.6  | 34.1  | 9.7   | 5.9             | 31                 | 5.0  | 31.5  | 14.8  | 7.0   | 1,080,866 | 2.5 | 35.0  | 11.6  | 6.1   |
|                                                  | Conifer     | 2,459            | 3.6  | 33.6  | 8.8   | 4.8             | 19                 | 6.5  | 29.7  | 12.9  | 6.6   | 831,619   | 2.5 | 34.8  | 10.0  | 5.0   |
|                                                  | Mixedwood   | 528              | 3.7  | 34.1  | 13.5  | 7.4             | 7                  | 12.0 | 31.5  | 19.7  | 7.0   | 146,738   | 2.6 | 34.9  | 16.5  | 6.7   |
|                                                  | Broadleaf   | 219              | 3.7  | 34.0  | 15.7  | 8.3             | 5                  | 5.0  | 20.4  | 14.9  | 6.1   | 102,509   | 2.6 | 35.0  | 17.4  | 6.1   |
| Crown closure (%)                                | ALL         | 3,600            | 11.7 | 77.0  | 39.9  | 10.7            |                    |      |       |       |       |           |     |       |       |       |
|                                                  | Conifer     | 2,459            | 14.9 | 74.1  | 39.1  | 9.6             |                    |      |       |       |       |           |     |       |       |       |
|                                                  | Mixedwood   | 528              | 18.1 | 67.6  | 42.5  | 10.8            |                    |      |       |       |       |           |     |       |       |       |
|                                                  | Broadleaf   | 219              | 21.2 | 77.0  | 55.1  | 11.2            |                    |      |       |       |       |           |     |       |       |       |
| Stand volume (m <sup>3</sup> ·ha <sup>-1</sup> ) | ALL         | 3,600            | 6.3  | 404.1 | 50.8  | 65.0            | 31                 | 1.1  | 361.0 | 93.0  | 99.3  | 1,080,866 | 3.3 | 422.2 | 66.5  | 66.3  |
|                                                  | Conifer     | 2,459            | 6.3  | 393.1 | 40.9  | 49.2            | 19                 | 1.1  | 255.9 | 63.9  | 80.6  | 831,619   | 3.3 | 418.8 | 49.7  | 50.8  |
|                                                  | Mixedwood   | 528              | 6.9  | 404.1 | 89.7  | 89.1            | 7                  | 31.5 | 361.0 | 169.4 | 125.7 | 146,738   | 3.5 | 421.4 | 118.9 | 81.2  |
|                                                  | Broadleaf   | 219              | 6.9  | 400.5 | 116.9 | 101.4           | 5                  | 4.0  | 166.2 | 96.9  | 81.8  | 102,509   | 3.5 | 422.2 | 127.8 | 76.7  |
| Total volume (m <sup>3</sup> ·ha <sup>-1</sup> ) | ALL         | 3,600            | 16.7 | 530.1 | 82.4  | 87.1            | 31                 | 5.9  | 545.3 | 135.8 | 141.4 | 1,080,866 | 7.9 | 602.1 | 108.6 | 97.5  |
|                                                  | Conifer     | 2,459            | 16.7 | 517.3 | 69.3  | 66.9            | 19                 | 5.9  | 328.5 | 96.4  | 108.8 | 831,619   | 7.9 | 597.7 | 83.7  | 75.7  |
|                                                  | Mixedwood   | 528              | 17.8 | 530.1 | 135.6 | 117.1           | 7                  | 43.4 | 545.3 | 252.2 | 190.4 | 146,738   | 8.2 | 601.1 | 186.3 | 117.3 |
|                                                  | Broadleaf   | 219              | 17.8 | 525.8 | 171.4 | 132.8           | 5                  | 6.6  | 224.7 | 122.3 | 104.9 | 102,509   | 8.4 | 602.1 | 199.9 | 110.1 |
| AGB (t·ha <sup>-1</sup> )                        | ALL         | 3,600            | 1.2  | 352.1 | 54.2  | 51.6            | 30                 | 4.5  | 300.1 | 85.4  | 77.0  | 1,080,734 | 7.9 | 326.4 | 72.1  | 55.1  |
|                                                  | Conifer     | 2,459            | 15.1 | 286.5 | 49.2  | 38.6            | 18                 | 7.6  | 195.8 | 64.4  | 59.6  | 831,499   | 7.9 | 324.4 | 57.9  | 43.5  |
|                                                  | Mixedwood   | 528              | 15.9 | 292.6 | 87.2  | 64.8            | 7                  | 26.7 | 300.1 | 147.7 | 100.8 | 146,726   | 8.2 | 325.9 | 116.3 | 64.3  |
|                                                  | Broadleaf   | 219              | 15.9 | 290.6 | 107.0 | 73.1            | 5                  | 4.5  | 127.5 | 74.0  | 61.2  | 102,509   | 8.3 | 326.4 | 124.3 | 59.8  |

<sup>a</sup> samples with numbers in grey italic font not used for validation due to small sample size

<sup>b</sup> standard deviation

**Table S3:** Linear regression (predicted ~ observed) goodness of fit (Adj. R<sup>2</sup>) along with slope, intercept, root mean square error (RMSE) (p-value < 0.001) for four attributes across broad forest types (rows) and across two Satellite Vegetation Inventory (SVI) map versions (SVI: final maps; SVI\_L: Landsat-based map) and previously published (PUB) Landsat-based maps (columns) based on two independent validation sets: a) National Forest Inventory (NFI) plots and b) boreal transect airborne laser scanning (BT-ALS) LiDAR plots. Empty cells are due to missing published maps for total and stand volume. See Table S2 for the descriptive statistics of the two validation sets.

| a) NFI                                           |             |    | Adj. R <sup>2</sup> |       |      | Slope |       |      | Intercept |       |       | RMSE   |        |       |
|--------------------------------------------------|-------------|----|---------------------|-------|------|-------|-------|------|-----------|-------|-------|--------|--------|-------|
| Attribute                                        | Forest Type | n  | SVI                 | SVI_L | PUB  | SVI   | SVI_L | PUB  | SVI       | SVI_L | PUB   | SVI    | SVI_L  | PUB   |
| Stand height (m)                                 | All         | 31 | 0.48                | 0.34  | 0.32 | 0.89  | 0.86  | 1.25 | 2.6       | 3.5   | 1.1   | 5.03   | 5.66   | 5.75  |
|                                                  | Conifer     | 19 | 0.58                | 0.36  | 0.55 | 0.91  | 0.87  | 1.50 | 1.5       | 2.5   | -2.2  | 4.32   | 5.32   | 4.45  |
| Stand volume (m <sup>3</sup> ·ha <sup>-1</sup> ) | All         | 31 | 0.40                | 0.31  |      | 1.07  | 1.10  |      | -3.2      | 1.5   |       | 76.59  | 82.39  |       |
|                                                  | Conifer     | 19 | 0.66                | 0.44  |      | 1.11  | 1.13  |      | -20.7     | -16.2 |       | 47.14  | 60.29  |       |
| Total volume (m <sup>3</sup> ·ha <sup>-1</sup> ) | All         | 31 | 0.41                | 0.29  |      | 1.14  | 1.13  |      | -19.7     | -8.1  |       | 108.71 | 118.95 |       |
|                                                  | Conifer     | 19 | 0.70                | 0.44  |      | 1.13  | 1.11  |      | -37.7     | -27.3 |       | 60.09  | 81.69  |       |
| Aboveground biomass (t·ha <sup>-1</sup> )        | All         | 30 | 0.45                | 0.35  | 0.43 | 1.09  | 1.10  | 2.14 | -9.0      | -4.2  | -47.1 | 57.02  | 62.13  | 58.40 |
|                                                  | Conifer     | 18 | 0.74                | 0.48  | 0.28 | 1.05  | 1.04  | 1.50 | -14.1     | -8.7  | -15.5 | 30.60  | 43.03  | 50.55 |

  

| b) BT-ALS                                        |             |           | Adj. R <sup>2</sup> |       |      | Slope |       |      | Intercept |       |       | RMSE  |        |       |
|--------------------------------------------------|-------------|-----------|---------------------|-------|------|-------|-------|------|-----------|-------|-------|-------|--------|-------|
| Attribute                                        | Forest Type | n         | SVI                 | SVI_L | PUB  | SVI   | SVI_L | PUB  | SVI       | SVI_L | PUB   | SVI   | SVI_L  | PUB   |
| Stand height (m)                                 | All         | 1,080,866 | 0.55                | 0.40  | 0.38 | 0.85  | 0.78  | 1.01 | 1.8       | 2.8   | 1.2   | 4.06  | 4.68   | 4.78  |
|                                                  | Conifer     | 831,619   | 0.51                | 0.35  | 0.32 | 0.78  | 0.68  | 0.94 | 2.1       | 3.1   | 1.3   | 3.47  | 3.98   | 4.08  |
|                                                  | Mixedwood   | 146,738   | 0.38                | 0.23  | 0.14 | 0.77  | 0.65  | 0.66 | 4.2       | 6.8   | 7.5   | 5.26  | 5.83   | 6.17  |
|                                                  | Broadleaf   | 102,509   | 0.26                | 0.14  | 0.11 | 0.61  | 0.46  | 0.50 | 7.4       | 10.4  | 10.3  | 5.22  | 5.64   | 5.74  |
| Stand volume (m <sup>3</sup> ·ha <sup>-1</sup> ) | All         | 1,080,866 | 0.50                | 0.35  |      | 0.81  | 0.75  |      | 11.8      | 18.3  |       | 46.96 | 53.44  |       |
|                                                  | Conifer     | 831,619   | 0.47                | 0.31  |      | 0.74  | 0.64  |      | 10.8      | 16.4  |       | 37.11 | 42.36  |       |
|                                                  | Mixedwood   | 146,738   | 0.32                | 0.18  |      | 0.74  | 0.61  |      | 34.6      | 54.9  |       | 67.20 | 73.37  |       |
|                                                  | Broadleaf   | 102,509   | 0.23                | 0.12  |      | 0.60  | 0.46  |      | 55.5      | 78.8  |       | 67.36 | 72.09  |       |
| Total volume (m <sup>3</sup> ·ha <sup>-1</sup> ) | All         | 1,080,866 | 0.51                | 0.36  |      | 0.90  | 0.83  |      | 13.5      | 24.2  |       | 68.18 | 77.87  |       |
|                                                  | Conifer     | 831,619   | 0.48                | 0.32  |      | 0.82  | 0.71  |      | 13.3      | 23.1  |       | 54.64 | 62.52  |       |
|                                                  | Mixedwood   | 146,738   | 0.33                | 0.19  |      | 0.82  | 0.68  |      | 47.5      | 79.9  |       | 96.11 | 105.25 |       |
|                                                  | Broadleaf   | 102,509   | 0.24                | 0.12  |      | 0.67  | 0.51  |      | 82.1      | 119.4 |       | 96.22 | 103.17 |       |
| Aboveground biomass (t·ha <sup>-1</sup> )        | All         | 1,080,734 | 0.53                | 0.38  | 0.54 | 0.89  | 0.81  | 2.08 | 10.5      | 17.4  | -44.7 | 37.60 | 43.35  | 37.33 |
|                                                  | Conifer     | 831,499   | 0.50                | 0.33  | 0.54 | 0.81  | 0.70  | 1.79 | 11.3      | 17.8  | -35.8 | 30.86 | 35.49  | 29.49 |
|                                                  | Mixedwood   | 146,726   | 0.35                | 0.21  | 0.42 | 0.82  | 0.68  | 2.06 | 28.7      | 48.9  | -24.9 | 51.74 | 57.06  | 49.01 |
|                                                  | Broadleaf   | 102,509   | 0.26                | 0.13  | 0.30 | 0.67  | 0.50  | 1.84 | 48.8      | 74.6  | -2.6  | 51.56 | 55.84  | 50.12 |

  

| Map versions |                                                                                                          |
|--------------|----------------------------------------------------------------------------------------------------------|
| SVI          | SVI final map version (PALSAR + Landsat + environmental features)                                        |
| SVI_L        | SVI Landsat-based map version (Landsat + environmental features)                                         |
| PUB          | Published Landsat-based maps of Mahoney et al. (2018) for stand height and of Wang et al. (2021) for AGB |

**Table S4:** Pixel-wise percent mean error (ME%) and percent root mean square error (RMSE%) for four attributes across broad forest types (rows) and across two Satellite Vegetation Inventory (SVI) map versions (SVI: final maps; SVI\_L: Landsat-based map) and previously published (PUB) Landsat-based maps (columns) based on two independent validation sets: a) National Forest Inventory (NFI) plots and b) boreal transect airborne laser scanning BT-ALS cells. Empty cells are due to missing Landsat-based published maps for total and stand volume See Table S2 for the descriptive statistics of the two validation sets.

| a) NFI                                           |             |    | ME%  |       |       | RMSE% |       |      |
|--------------------------------------------------|-------------|----|------|-------|-------|-------|-------|------|
| Attribute                                        | Forest Type | N  | SVI  | SVI_L | PUB   | SVI   | SVI_L | PUB  |
| Stand height (m)                                 | All         | 31 | -6.9 | -10.7 | -26.2 | 33.9  | 38.9  | 46.2 |
|                                                  | Conifer     | 19 | -3.2 | -7.0  | -21.7 | 32.1  | 39.9  | 41.2 |
| Stand volume (m <sup>3</sup> ·ha <sup>-1</sup> ) | All         | 31 | -3.5 | -10.7 |       | 79.8  | 86.5  |      |
|                                                  | Conifer     | 19 | 19.6 | 11.0  |       | 73.2  | 90.5  |      |
| Total volume (m <sup>3</sup> ·ha <sup>-1</sup> ) | All         | 31 | 0.7  | -5.8  |       | 77.9  | 85.2  |      |
|                                                  | Conifer     | 19 | 23.0 | 15.3  |       | 64.2  | 81.9  |      |
| Aboveground biomass (t·ha <sup>-1</sup> )        | All         | 30 | 1.6  | -4.7  | -27.7 | 64.7  | 70.6  | 78.2 |
|                                                  | Conifer     | 18 | 16.3 | 9.5   | -17.2 | 47.8  | 63.8  | 77.9 |

| b) BT-ALS                                        |             |           | ME%   |       |       | RMSE% |       |      |
|--------------------------------------------------|-------------|-----------|-------|-------|-------|-------|-------|------|
| Attribute                                        | Forest Type | N         | SVI   | SVI_L | PUB   | SVI   | SVI_L | PUB  |
| Stand height (m)                                 | All         | 1,080,866 | -0.6  | -2.8  | -10.8 | 35.8  | 41.7  | 42.7 |
|                                                  | Conifer     | 831,619   | 1.4   | 1.2   | -6.9  | 36.3  | 42.2  | 41.5 |
|                                                  | Mixedwood   | 146,738   | -3.6  | -9.0  | -18.2 | 33.0  | 38.1  | 42.4 |
|                                                  | Broadleaf   | 102,509   | -6.0  | -13.4 | -19.3 | 32.7  | 38.3  | 39.9 |
| Stand volume (m <sup>3</sup> ·ha <sup>-1</sup> ) | All         | 1,080,866 | 1.0   | -3.2  |       | 72.4  | 82.8  |      |
|                                                  | Conifer     | 831,619   | 5.3   | 5.0   |       | 78.6  | 91.1  |      |
|                                                  | Mixedwood   | 146,738   | -3.6  | -12.0 |       | 58.3  | 65.6  |      |
|                                                  | Broadleaf   | 102,509   | -6.3  | -17.2 |       | 56.3  | 63.6  |      |
| Total volume (m <sup>3</sup> ·ha <sup>-1</sup> ) | All         | 1,080,866 | -2.8  | -6.2  |       | 63.2  | 72.8  |      |
|                                                  | Conifer     | 831,619   | 2.2   | 2.0   |       | 66.7  | 77.6  |      |
|                                                  | Mixedwood   | 146,738   | -8.9  | -16.1 |       | 53.0  | 60.2  |      |
|                                                  | Broadleaf   | 102,509   | -11.5 | -21.0 |       | 51.3  | 58.7  |      |
| Aboveground biomass (t·ha <sup>-1</sup> )        | All         | 1,080,734 | -3.7  | -6.9  | -22.2 | 52.8  | 61.5  | 63.4 |
|                                                  | Conifer     | 831,499   | -0.4  | -0.8  | -9.6  | 54.8  | 64.1  | 57.3 |
|                                                  | Mixedwood   | 146,726   | -8.3  | -14.9 | -41.0 | 45.8  | 52.6  | 61.6 |
|                                                  | Broadleaf   | 102,509   | -10.0 | -19.3 | -44.6 | 44.3  | 52.0  | 61.3 |

Map versions

|       |                                                                                                         |
|-------|---------------------------------------------------------------------------------------------------------|
| SVI   | SVI final map version (PALSAR + Landsat + environmental features)                                       |
| SVI_L | SVI Landsat-based map version (Landsat + environmental features)                                        |
| PUB   | Published Landsat-based maps of Mahoney et al. (2018) for stand height and of Wang et al. (2021) for AC |

## Supplementary Material

### Figures S1 to S2

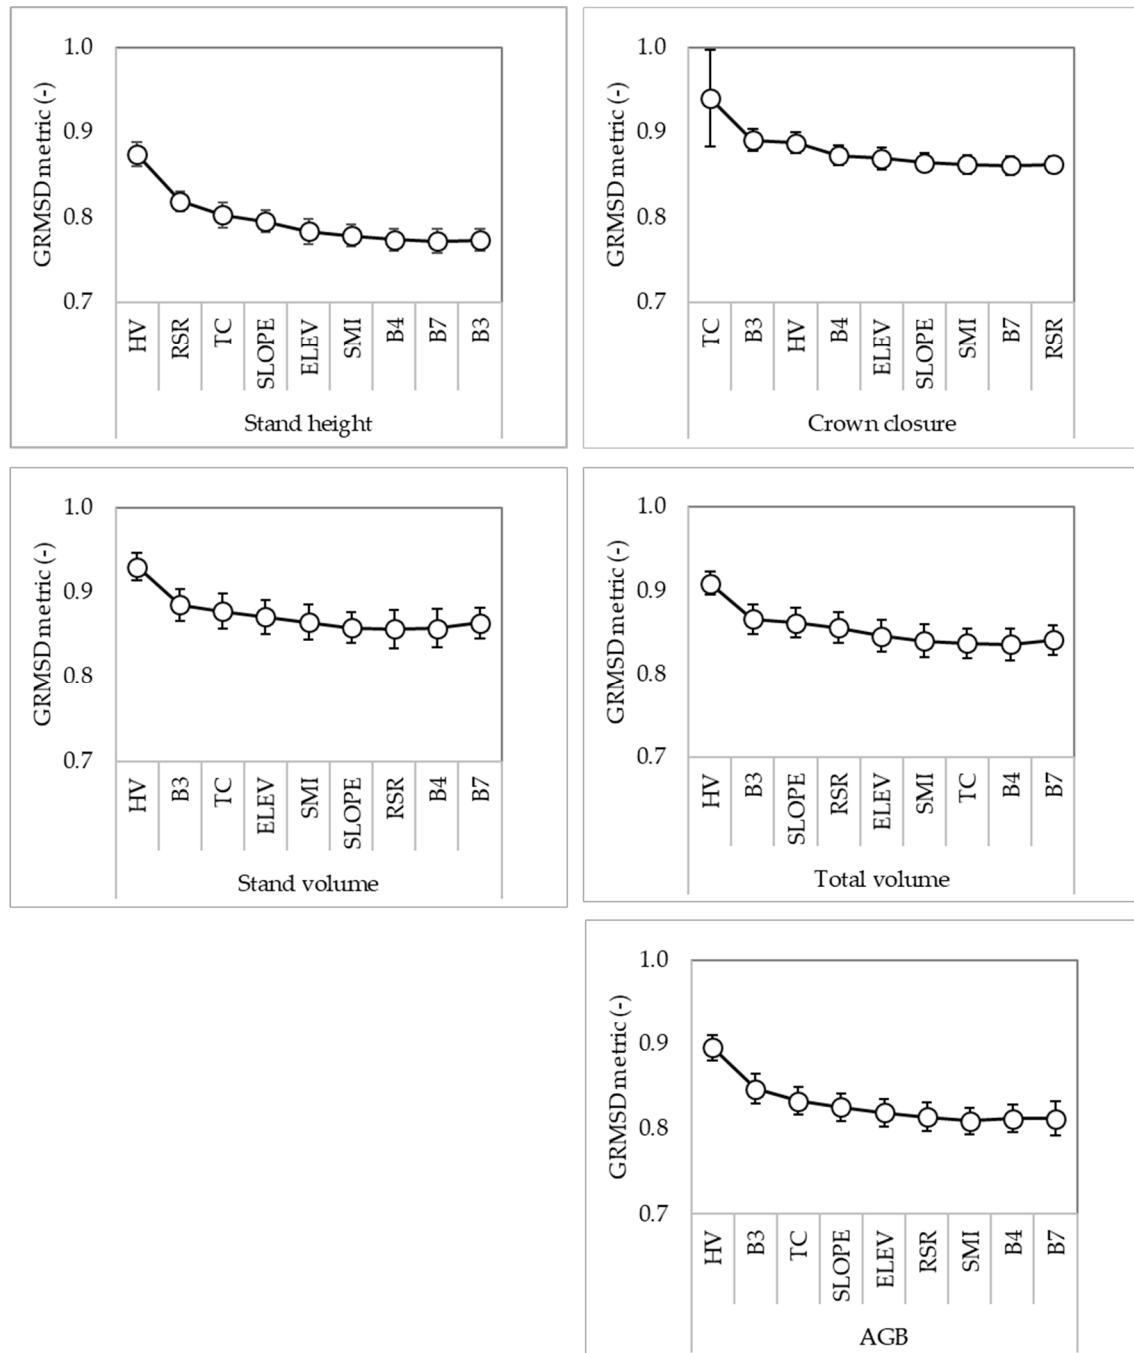

Figure S1: Univariate global root mean square difference (GRMSD) metric (the circle represents the mean, and the vertical bar length is  $\pm 1$  standard deviation) as function of forward iterative selection of best features among the final selection of nine features for stand height, crown closure, stand volume, total volume and above ground biomass (AGB). See Table 1 for more information regarding definition of the feature variables.

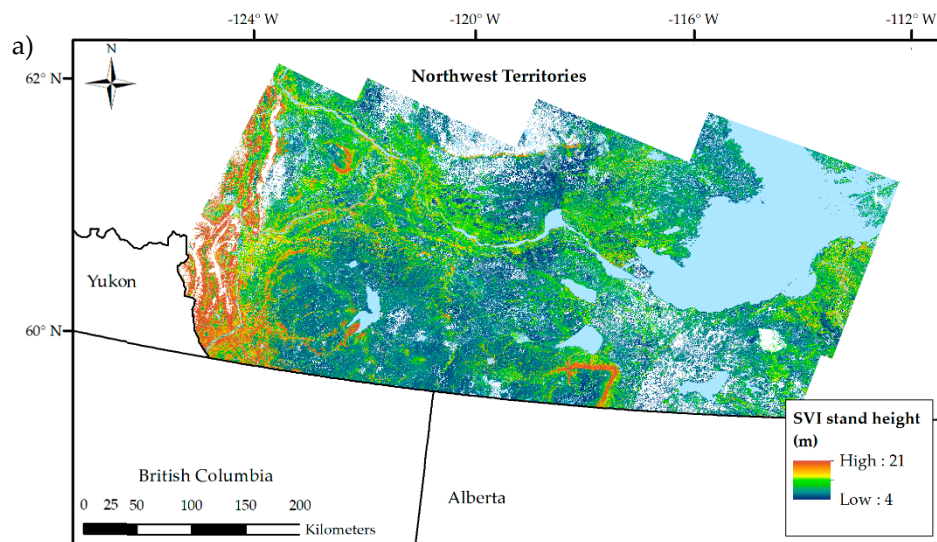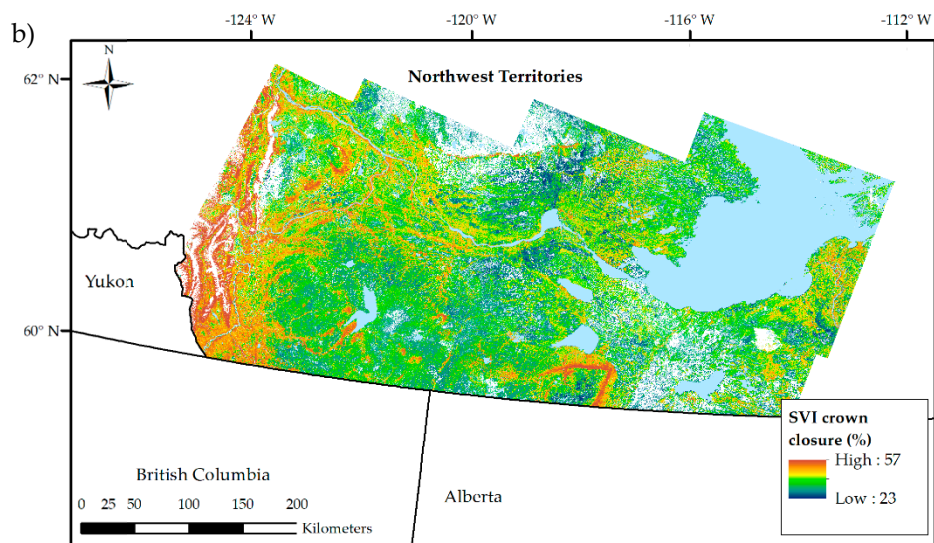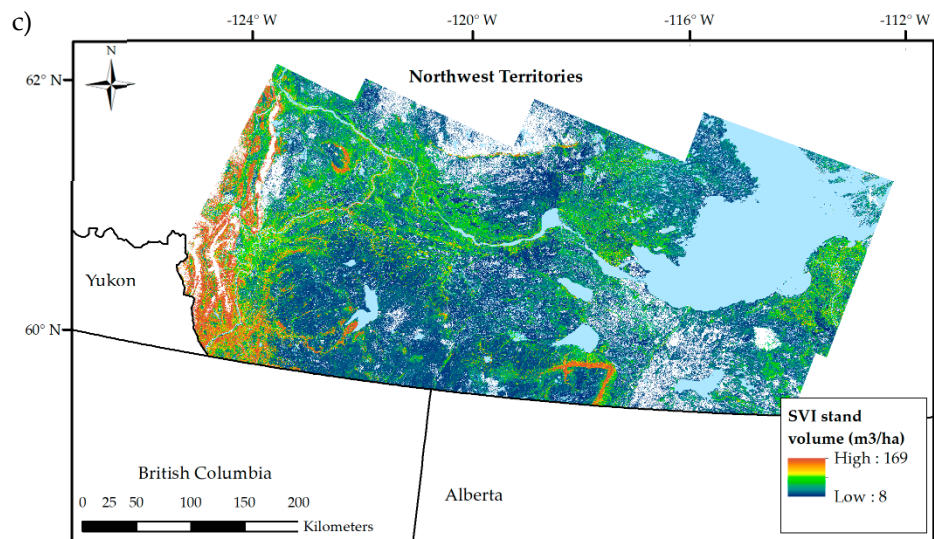

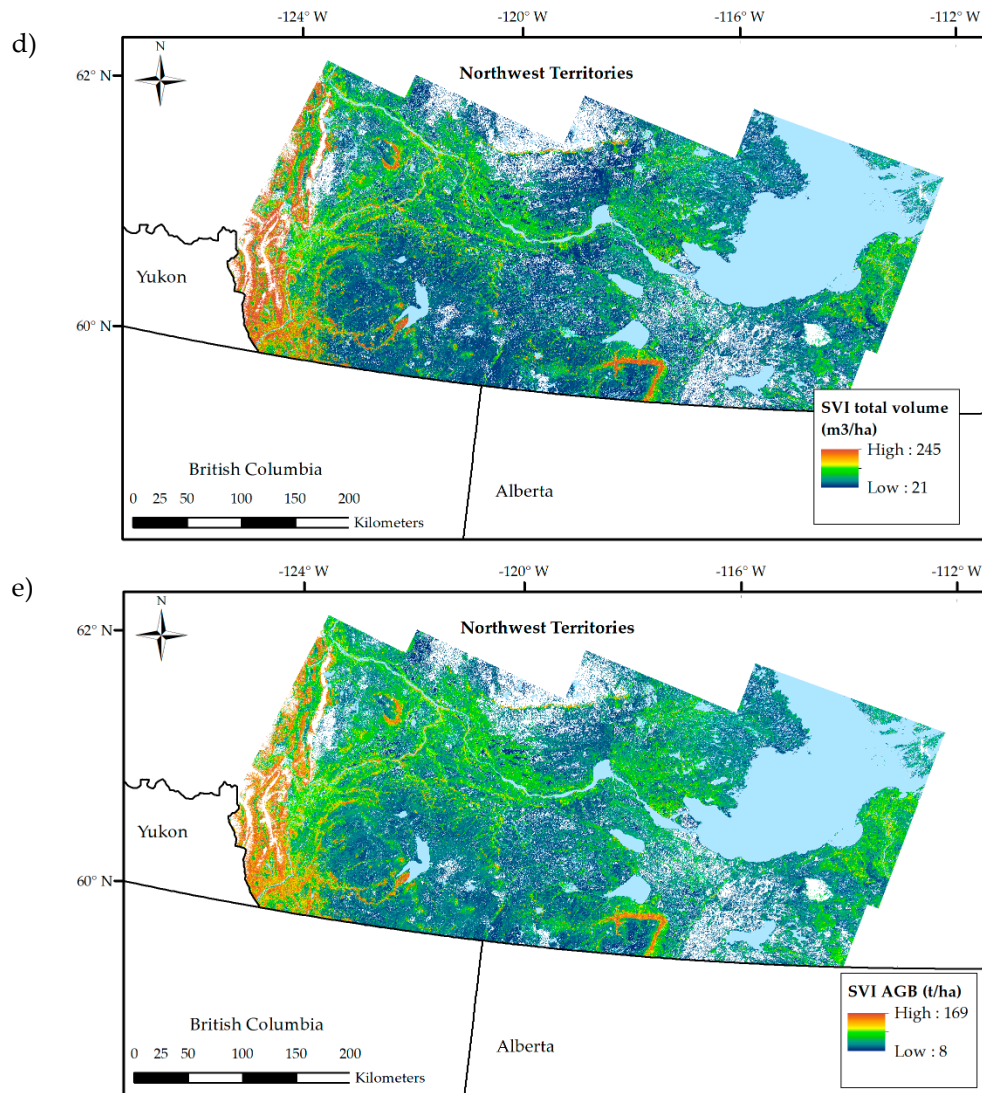

Figure S2: Satellite Vegetation Inventory (SVI) raster maps from  $k$ -NN predictions of a) stand height, b) crown closure, c) stand volume, d) total volume and e) aboveground biomass (AGB) for the Phase 1 area. White pixels are non-forested lands whereas light blue pixels are water bodies. Low and high attribute values are the 5% and 95% percentile, respectively.
